# Supplementary material for: The Role of Factor Xa-Independent Pathway and Anticoagulant Therapies in Cancer-Related Stroke
Source: MDPI journal article supplement (doi:10.3390/jcm11010123), 2021-12-27
Supplement: s1 [file s1]

## SUPPLEMENTAL MATERIAL

### Role of Factor Xa-Independent Pathway and Anticoagulant therapies in Cancer-related Stroke

Hyung Jun Kim, M.D., Jong-Won Chung, M.D., Ph.D., Oh Young Bang, M.D., Ph.D., Yun Jeong Lim, R.N., Jaechun Hwang, M.D. Woo-Keun Seo, M.D., Ph.D., Gyeong-Moon Kim, M.D., Ph.D., Hee-Jin Kim, M.D., Ph.D., Myung-Ju Ahn, M.D., Ph.D.

**Table S1.** Laboratory findings associated with recurrence of cancer stroke and treatment-related changes.

|                             | Situation 1         | Situation 2 | <i>P</i> |
|-----------------------------|---------------------|-------------|----------|
| Recurrence of cancer stroke | Stable              | Recurrence  |          |
| D-dimer, µg/mL (n=10)       | 8.80±7.31           | 28.11±21.22 | 0.002    |
| Factor Xa, % (n=9)          | 69.11±9.96          | 62.33±18.32 | 0.164    |
| cfDNA, ng/ml (n=6)          | 51.56±9.94          | 65.70±13.49 | 0.022    |
| Cancer stroke               | Enoxaparin          |             |          |
|                             | Pre-treat           | Post-treat  |          |
| D-dimer, µg/mL (n=32)       | 16.05±13.28         | 8.58±12.26  | 0.011    |
| Factor Xa, % (n=28)         | 71.35±25.15         | 71.92±19.56 | 0.858    |
| cfDNA, ng/ml (n=15)         | 53.69±18.86         | 52.98±11.41 | 0.495    |
| Cancer stroke               | Edoxaban            |             |          |
|                             | Pre-treat           | Post-treat  |          |
| D-dimer, µg/mL (n=12)       | 16.68±10.48         | 13.08±9.43  | 0.071    |
| Factor Xa, % (n=12)         | 77.44±15.49         | 68.94±14.61 | 0.019    |
| cfDNA, ng/ml (n=9)          | 56.73±6.54          | 71.38±12.30 | <0.001   |
| AF stroke                   | Factor Xa inhibitor |             |          |
|                             | Pre-treat           | Post-treat  |          |
| D-dimer, µg/mL (n=16)       | 1.53±1.76           | 0.37±0.16   | 0.009    |
| Factor Xa, % (n=35)         | 81.92±15.10         | 75.71±14.21 | 0.002    |
| cfDNA, ng/ml (n=15)         | 41.97±7.75          | 38.05±4.04  | 0.096    |

**Figure S1.** An example case showing D-dimer, factor Xa activity, and cell free DNA levels changes between the occurrence and recurrence of cancer stroke.

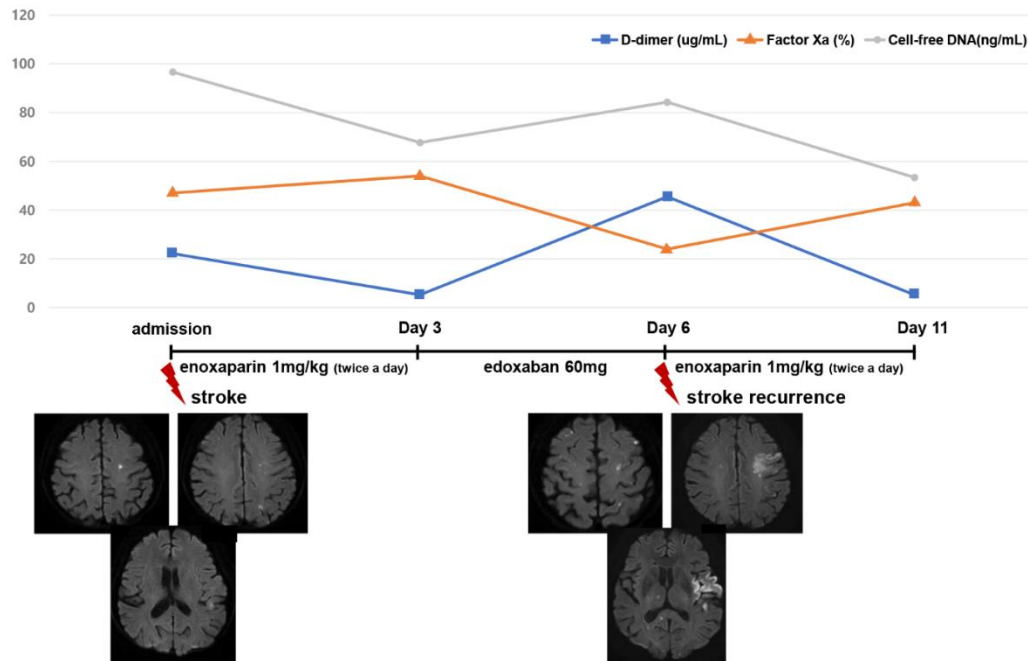

A 65-year-old female patient with pancreatic head cancer and liver metastasis was referred to a neurologist due to sudden disorientation while hospitalized for chemotherapy. After 3 days of receiving 1 mg/kg enoxaparin (twice a day), D-dimer level decreased and the disorientation improved, so she was transferred to edoxaban. After 3 days of receiving edoxaban, worsening of disorientation and right-hand weakness occurred, and stroke recurrence was confirmed by the diffusion-weighted image.
